# Supplementary material for: The interplay between surface-functionalized gold nanoparticles and negatively charged lipid vesicles
Source: Royal Society of Chemistry journal article supplement (doi:10.1039/d1cp01903a), 2021-01-01
Supplement: d1cp01903a1.pdf [file d1cp01903a1.pdf]

## Electronic supplementary information for

### The interplay between surface-functionalized gold nanoparticles and negatively-charged lipid vesicles

Xuebo Quan<sup>a</sup>, Daohui Zhao<sup>b</sup> and Jian Zhou<sup>\*a</sup>

<sup>a</sup> School of Chemistry and Chemical Engineering, Guangdong Provincial Key Lab for Green Chemical Product Technology, South China University of Technology, Guangzhou 510640, P. R. China

E-mail: [jianzhou@scut.edu.cn](mailto:jianzhou@scut.edu.cn)

<sup>b</sup> Hubei Collaborative Innovation Centre for Advanced Organic Chemical Materials, Ministry of Education Key Laboratory for the Synthesis and Application of Organic Functional Molecules, School of Chemistry and Chemical Engineering, Hubei University, Wuhan 430062, P.R. China

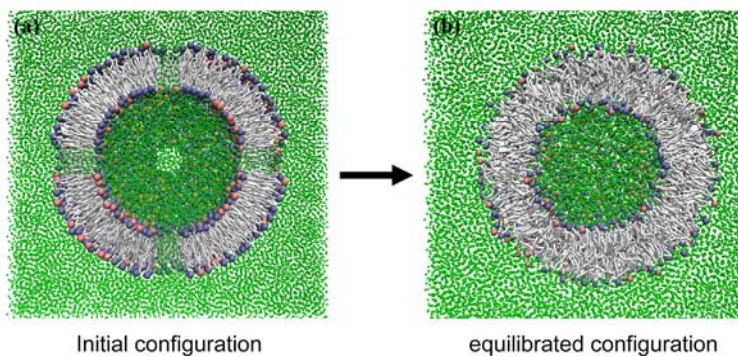

**Fig. S1.** The (a) initial and (b) final equilibrated configurations of the lipid vesicle.

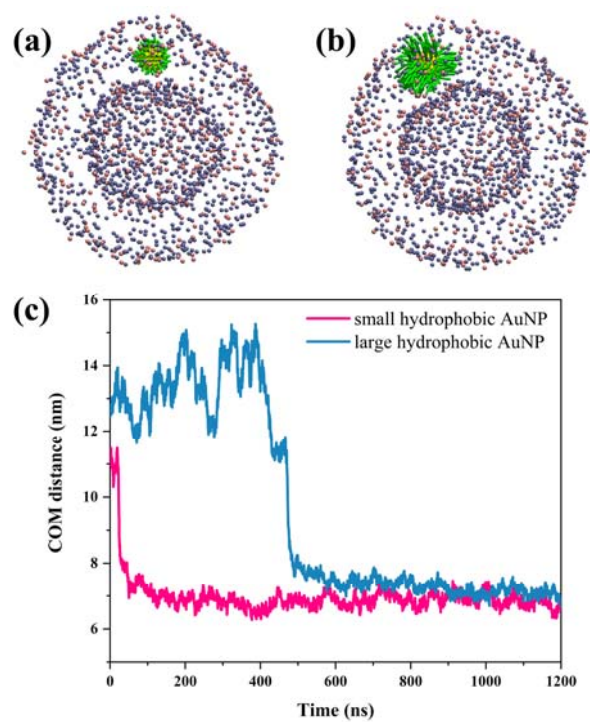

**Fig. S2.** Equilibrated states of (a) small and (b) large hydrophobic AuNPs interacting with the lipid vesicle, (c) COM distance between hydrophobic AuNPs and the lipid vesicle.
